# Supplementary material
Source: publisher figshare collection journal article supplement (https://acs.figshare.com/ndownloader/files/3758302)
Supplement: Supplementary file 1 [file 3758302]

data_D:\615\mo_2014615_0m.CIF

_audit_creation_method            SHELXL-97
_chemical_name_systematic
;
 ?
;
_chemical_name_common             '4'
_chemical_melting_point           ?
_chemical_formula_moiety          ?
_chemical_formula_sum
 'C15 H12 O6'
_chemical_formula_weight          288.25

loop_
 _atom_type_symbol 
 _atom_type_description 
 _atom_type_scat_dispersion_real 
 _atom_type_scat_dispersion_imag 
 _atom_type_scat_source 
 'C'  'C'   0.0033   0.0016 
 'International Tables Vol C Tables 4.2.6.8 and 6.1.1.4' 
 'H'  'H'   0.0000   0.0000 
 'International Tables Vol C Tables 4.2.6.8 and 6.1.1.4' 
 'O'  'O'   0.0106   0.0060 
 'International Tables Vol C Tables 4.2.6.8 and 6.1.1.4' 

_symmetry_cell_setting            triclinic
_symmetry_space_group_name_H-M    P-1

loop_
 _symmetry_equiv_pos_as_xyz 
 'x, y, z' 
 '-x, -y, -z' 

_cell_length_a                    7.8486(13)
_cell_length_b                    9.7046(16)
_cell_length_c                    10.4672(19)
_cell_angle_alpha                 104.171(10)
_cell_angle_beta                  110.512(10)
_cell_angle_gamma                 107.425(10)
_cell_volume                      655.61(19)
_cell_formula_units_Z             2
_cell_measurement_temperature     296(2)
_cell_measurement_reflns_used     6169
_cell_measurement_theta_min       4.50
_cell_measurement_theta_max       54.87

_exptl_crystal_description        'plate'
_exptl_crystal_colour             'yellow'
_exptl_crystal_size_max           0.15
_exptl_crystal_size_mid           0.10
_exptl_crystal_size_min           0.10
_exptl_crystal_density_meas       ?
_exptl_crystal_density_diffrn     1.460
_exptl_crystal_density_method     'not measured'
_exptl_crystal_F_000              300
_exptl_absorpt_coefficient_mu     0.114
_exptl_absorpt_correction_type    'multi-scan'
_exptl_absorpt_correction_T_min   0.9684
_exptl_absorpt_correction_T_max   0.9893
_exptl_absorpt_process_details    sadabs

_exptl_special_details
;
 ?
;

_diffrn_ambient_temperature       296(2)
_diffrn_radiation_wavelength      0.71073
_diffrn_radiation_type            MoK\a
_diffrn_radiation_source          'fine-focus sealed tube'
_diffrn_radiation_monochromator   'graphite'
_diffrn_measurement_device_type   'Bruker APEX-II CCD'
_diffrn_measurement_method        'phi and omega scans'
_diffrn_detector_area_resol_mean  ?
_diffrn_standards_number          ?
_diffrn_standards_interval_count  ?
_diffrn_standards_interval_time   ?
_diffrn_standards_decay_%         ?
_diffrn_reflns_number             10895
_diffrn_reflns_av_R_equivalents   0.0236
_diffrn_reflns_av_sigmaI/netI     0.0279
_diffrn_reflns_limit_h_min        -10
_diffrn_reflns_limit_h_max        10
_diffrn_reflns_limit_k_min        -11
_diffrn_reflns_limit_k_max        12
_diffrn_reflns_limit_l_min        -13
_diffrn_reflns_limit_l_max        12
_diffrn_reflns_theta_min          2.26
_diffrn_reflns_theta_max          27.53
_reflns_number_total              3006
_reflns_number_gt                 2060
_reflns_threshold_expression      >2sigma(I)

_computing_data_collection        'Bruker APEX2'
_computing_cell_refinement        'Bruker SAINT'
_computing_data_reduction         'Bruker SAINT'
_computing_structure_solution     'SHELXS-97 (Sheldrick, 2008)'
_computing_structure_refinement   'SHELXL-97 (Sheldrick, 2008)'
_computing_molecular_graphics     'Bruker SHELXTL'
_computing_publication_material   'Bruker SHELXTL'

_refine_special_details
;
 Refinement of F^2^ against ALL reflections.  The weighted R-factor wR and
 goodness of fit S are based on F^2^, conventional R-factors R are based
 on F, with F set to zero for negative F^2^. The threshold expression of
 F^2^ > 2sigma(F^2^) is used only for calculating R-factors(gt) etc. and is
 not relevant to the choice of reflections for refinement.  R-factors based
 on F^2^ are statistically about twice as large as those based on F, and R-
 factors based on ALL data will be even larger.
;

_refine_ls_structure_factor_coef  Fsqd
_refine_ls_matrix_type            full
_refine_ls_weighting_scheme       calc
_refine_ls_weighting_details
 'calc w=1/[\s^2^(Fo^2^)+(0.0741P)^2^+0.0000P] where P=(Fo^2^+2Fc^2^)/3'
_atom_sites_solution_primary      direct
_atom_sites_solution_secondary    difmap
_atom_sites_solution_hydrogens    geom
_refine_ls_hydrogen_treatment     mixed
_refine_ls_extinction_method      none
_refine_ls_extinction_coef        0.0059(6)
_refine_ls_extinction_expression
 'Fc^*^=kFc[1+0.001xFc^2^\l^3^/sin(2\q)]^-1/4^'
_refine_ls_number_reflns          3006
_refine_ls_number_parameters      201
_refine_ls_number_restraints      0
_refine_ls_R_factor_all           0.0692
_refine_ls_R_factor_gt            0.0418
_refine_ls_wR_factor_ref          0.1283
_refine_ls_wR_factor_gt           0.1132
_refine_ls_goodness_of_fit_ref    1.040
_refine_ls_restrained_S_all       1.040
_refine_ls_shift/su_max           0.000
_refine_ls_shift/su_mean          0.000

loop_
 _atom_site_label 
 _atom_site_type_symbol 
 _atom_site_fract_x 
 _atom_site_fract_y 
 _atom_site_fract_z 
 _atom_site_U_iso_or_equiv 
 _atom_site_adp_type 
 _atom_site_occupancy 
 _atom_site_symmetry_multiplicity 
 _atom_site_calc_flag 
 _atom_site_refinement_flags 
 _atom_site_disorder_assembly 
 _atom_site_disorder_group 
O1S O 0.6775(2) 0.87131(13) 0.48021(16) 0.0476(3) Uani 1 1 d . . . 
O4 O 1.27918(14) 0.82720(11) 0.42253(12) 0.0462(3) Uani 1 1 d . . . 
H3 H 1.2492 0.9013 0.4398 0.069 Uiso 1 1 calc R . . 
O1 O 0.63307(14) 0.27235(11) 0.24233(11) 0.0400(3) Uani 1 1 d . . . 
O3 O 1.33240(14) 0.56486(12) 0.39383(14) 0.0523(3) Uani 1 1 d . . . 
H2 H 1.3319 0.4789 0.3876 0.078 Uiso 1 1 calc R . . 
O2 O 1.18047(15) 0.26884(12) 0.33578(13) 0.0509(3) Uani 1 1 d . . . 
C11 C 0.2907(2) 0.01732(19) 0.15369(18) 0.0518(4) Uani 1 1 d . . . 
H6 H 0.2952 0.1175 0.1824 0.062 Uiso 1 1 calc R . . 
C12 C 0.1118(3) -0.1118(2) 0.0974(2) 0.0642(5) Uani 1 1 d . . . 
H7 H -0.0035 -0.0983 0.0890 0.077 Uiso 1 1 calc R . . 
C13 C 0.1023(3) -0.2606(2) 0.0534(2) 0.0637(5) Uani 1 1 d . . . 
H8 H -0.0190 -0.3475 0.0150 0.076 Uiso 1 1 calc R . . 
O5 O 0.91162(15) 0.82343(11) 0.36038(13) 0.0486(3) Uani 1 1 d . . . 
H4 H 0.8195 0.8224 0.3807 0.073 Uiso 1 1 calc R . . 
C5 C 1.1167(2) 0.69103(16) 0.37620(16) 0.0362(3) Uani 1 1 d . . . 
C4 C 1.1461(2) 0.55595(16) 0.36220(15) 0.0365(3) Uani 1 1 d . . . 
C9 C 0.9847(2) 0.41221(15) 0.31848(15) 0.0341(3) Uani 1 1 d . . . 
C8 C 0.7969(2) 0.41104(15) 0.28913(15) 0.0344(3) Uani 1 1 d . . . 
C1 C 0.6553(2) 0.13646(16) 0.22614(15) 0.0378(3) Uani 1 1 d . . . 
C10 C 0.4638(2) -0.00078(17) 0.16789(15) 0.0398(4) Uani 1 1 d . . . 
C15 C 0.4523(3) -0.15204(18) 0.12273(18) 0.0513(4) Uani 1 1 d . . . 
H10 H 0.5670 -0.1664 0.1307 0.062 Uiso 1 1 calc R . . 
C14 C 0.2731(3) -0.28029(19) 0.06654(19) 0.0614(5) Uani 1 1 d . . . 
H9 H 0.2673 -0.3808 0.0373 0.074 Uiso 1 1 calc R . . 
C2 C 0.8357(2) 0.13268(17) 0.26002(16) 0.0420(4) Uani 1 1 d . . . 
H1 H 0.8456 0.0382 0.2527 0.050 Uiso 1 1 calc R . . 
C3 C 1.0106(2) 0.26977(17) 0.30662(16) 0.0384(3) Uani 1 1 d . . . 
C7 C 0.7643(2) 0.54448(16) 0.30169(16) 0.0381(3) Uani 1 1 d . . . 
H5 H 0.6374 0.5408 0.2815 0.046 Uiso 1 1 calc R . . 
C6 C 0.9261(2) 0.68450(16) 0.34527(16) 0.0369(3) Uani 1 1 d . . . 
H1S H 0.726(3) 0.844(2) 0.547(2) 0.063(6) Uiso 1 1 d . . . 
H2S H 0.566(4) 0.839(3) 0.448(3) 0.107(10) Uiso 1 1 d . . . 

loop_
 _atom_site_aniso_label 
 _atom_site_aniso_U_11 
 _atom_site_aniso_U_22 
 _atom_site_aniso_U_33 
 _atom_site_aniso_U_23 
 _atom_site_aniso_U_13 
 _atom_site_aniso_U_12 
O1S 0.0387(7) 0.0396(6) 0.0710(9) 0.0246(6) 0.0267(6) 0.0202(5) 
O4 0.0403(6) 0.0296(6) 0.0720(7) 0.0185(5) 0.0287(5) 0.0168(5) 
O1 0.0364(5) 0.0285(5) 0.0522(6) 0.0125(5) 0.0188(5) 0.0144(4) 
O3 0.0366(6) 0.0418(6) 0.0831(8) 0.0233(6) 0.0282(6) 0.0221(5) 
O2 0.0458(6) 0.0434(6) 0.0729(8) 0.0229(6) 0.0284(6) 0.0290(5) 
C11 0.0505(9) 0.0379(9) 0.0612(11) 0.0110(8) 0.0296(8) 0.0134(7) 
C12 0.0519(10) 0.0579(12) 0.0728(13) 0.0172(10) 0.0330(9) 0.0121(9) 
C13 0.0636(12) 0.0429(10) 0.0575(11) 0.0120(8) 0.0252(9) -0.0020(9) 
O5 0.0488(6) 0.0338(6) 0.0813(8) 0.0281(6) 0.0385(6) 0.0251(5) 
C5 0.0363(7) 0.0314(7) 0.0415(8) 0.0144(6) 0.0189(6) 0.0139(6) 
C4 0.0353(7) 0.0373(8) 0.0417(8) 0.0151(6) 0.0189(6) 0.0202(6) 
C9 0.0374(7) 0.0320(7) 0.0342(7) 0.0113(6) 0.0164(6) 0.0181(6) 
C8 0.0347(7) 0.0288(7) 0.0370(8) 0.0105(6) 0.0154(6) 0.0129(6) 
C1 0.0463(8) 0.0299(7) 0.0357(8) 0.0105(6) 0.0184(7) 0.0167(6) 
C10 0.0451(8) 0.0327(8) 0.0348(8) 0.0100(6) 0.0170(7) 0.0122(6) 
C15 0.0549(10) 0.0332(8) 0.0546(10) 0.0132(7) 0.0198(8) 0.0144(7) 
C14 0.0732(13) 0.0328(9) 0.0591(11) 0.0127(8) 0.0233(10) 0.0113(9) 
C2 0.0501(9) 0.0292(8) 0.0502(9) 0.0147(7) 0.0231(7) 0.0215(7) 
C3 0.0423(8) 0.0374(8) 0.0400(8) 0.0144(6) 0.0190(7) 0.0228(7) 
C7 0.0335(7) 0.0359(8) 0.0496(9) 0.0170(7) 0.0204(7) 0.0189(6) 
C6 0.0428(8) 0.0322(7) 0.0445(8) 0.0173(6) 0.0224(7) 0.0219(6) 

_geom_special_details
;
 All esds (except the esd in the dihedral angle between two l.s. planes)
 are estimated using the full covariance matrix.  The cell esds are taken
 into account individually in the estimation of esds in distances, angles
 and torsion angles; correlations between esds in cell parameters are only
 used when they are defined by crystal symmetry.  An approximate (isotropic)
 treatment of cell esds is used for estimating esds involving l.s. planes.
;

loop_
 _geom_bond_atom_site_label_1 
 _geom_bond_atom_site_label_2 
 _geom_bond_distance 
 _geom_bond_site_symmetry_2 
 _geom_bond_publ_flag 
O1S H1S 0.82(2) . ? 
O1S H2S 0.74(3) . ? 
O4 C5 1.3607(16) . ? 
O4 H3 0.8200 . ? 
O1 C1 1.3589(16) . ? 
O1 C8 1.3800(16) . ? 
O3 C4 1.3511(16) . ? 
O3 H2 0.8200 . ? 
O2 C3 1.2626(16) . ? 
C11 C12 1.376(2) . ? 
C11 C10 1.383(2) . ? 
C11 H6 0.9300 . ? 
C12 C13 1.374(3) . ? 
C12 H7 0.9300 . ? 
C13 C14 1.375(3) . ? 
C13 H8 0.9300 . ? 
O5 C6 1.3622(15) . ? 
O5 H4 0.8200 . ? 
C5 C4 1.3800(19) . ? 
C5 C6 1.3929(19) . ? 
C4 C9 1.4082(19) . ? 
C9 C8 1.3922(18) . ? 
C9 C3 1.4384(18) . ? 
C8 C7 1.3780(18) . ? 
C1 C2 1.3482(19) . ? 
C1 C10 1.472(2) . ? 
C10 C15 1.392(2) . ? 
C15 C14 1.373(2) . ? 
C15 H10 0.9300 . ? 
C14 H9 0.9300 . ? 
C2 C3 1.418(2) . ? 
C2 H1 0.9300 . ? 
C7 C6 1.3872(19) . ? 
C7 H5 0.9300 . ? 

loop_
 _geom_angle_atom_site_label_1 
 _geom_angle_atom_site_label_2 
 _geom_angle_atom_site_label_3 
 _geom_angle 
 _geom_angle_site_symmetry_1 
 _geom_angle_site_symmetry_3 
 _geom_angle_publ_flag 
H1S O1S H2S 112(2) . . ? 
C5 O4 H3 109.5 . . ? 
C1 O1 C8 119.94(11) . . ? 
C4 O3 H2 109.5 . . ? 
C12 C11 C10 120.47(16) . . ? 
C12 C11 H6 119.8 . . ? 
C10 C11 H6 119.8 . . ? 
C13 C12 C11 120.47(18) . . ? 
C13 C12 H7 119.8 . . ? 
C11 C12 H7 119.8 . . ? 
C12 C13 C14 119.67(16) . . ? 
C12 C13 H8 120.2 . . ? 
C14 C13 H8 120.2 . . ? 
C6 O5 H4 109.5 . . ? 
O4 C5 C4 117.61(12) . . ? 
O4 C5 C6 122.61(12) . . ? 
C4 C5 C6 119.78(13) . . ? 
O3 C4 C5 118.92(13) . . ? 
O3 C4 C9 120.88(12) . . ? 
C5 C4 C9 120.19(12) . . ? 
C8 C9 C4 118.14(12) . . ? 
C8 C9 C3 120.01(13) . . ? 
C4 C9 C3 121.84(12) . . ? 
C7 C8 O1 117.19(12) . . ? 
C7 C8 C9 122.52(12) . . ? 
O1 C8 C9 120.28(12) . . ? 
C2 C1 O1 122.01(13) . . ? 
C2 C1 C10 125.34(13) . . ? 
O1 C1 C10 112.64(12) . . ? 
C11 C10 C15 118.56(14) . . ? 
C11 C10 C1 120.89(14) . . ? 
C15 C10 C1 120.54(14) . . ? 
C14 C15 C10 120.61(16) . . ? 
C14 C15 H10 119.7 . . ? 
C10 C15 H10 119.7 . . ? 
C15 C14 C13 120.22(16) . . ? 
C15 C14 H9 119.9 . . ? 
C13 C14 H9 119.9 . . ? 
C1 C2 C3 121.37(13) . . ? 
C1 C2 H1 119.3 . . ? 
C3 C2 H1 119.3 . . ? 
O2 C3 C2 122.68(13) . . ? 
O2 C3 C9 121.06(13) . . ? 
C2 C3 C9 116.26(12) . . ? 
C8 C7 C6 118.10(12) . . ? 
C8 C7 H5 121.0 . . ? 
C6 C7 H5 121.0 . . ? 
O5 C6 C7 123.32(12) . . ? 
O5 C6 C5 115.42(13) . . ? 
C7 C6 C5 121.26(12) . . ? 

loop_
 _geom_torsion_atom_site_label_1 
 _geom_torsion_atom_site_label_2 
 _geom_torsion_atom_site_label_3 
 _geom_torsion_atom_site_label_4 
 _geom_torsion 
 _geom_torsion_site_symmetry_1 
 _geom_torsion_site_symmetry_2 
 _geom_torsion_site_symmetry_3 
 _geom_torsion_site_symmetry_4 
 _geom_torsion_publ_flag 
C10 C11 C12 C13 -0.5(3) . . . . ? 
C11 C12 C13 C14 0.3(3) . . . . ? 
O4 C5 C4 O3 -0.4(2) . . . . ? 
C6 C5 C4 O3 -179.48(13) . . . . ? 
O4 C5 C4 C9 178.32(12) . . . . ? 
C6 C5 C4 C9 -0.7(2) . . . . ? 
O3 C4 C9 C8 179.23(12) . . . . ? 
C5 C4 C9 C8 0.5(2) . . . . ? 
O3 C4 C9 C3 0.5(2) . . . . ? 
C5 C4 C9 C3 -178.24(12) . . . . ? 
C1 O1 C8 C7 179.24(12) . . . . ? 
C1 O1 C8 C9 0.64(19) . . . . ? 
C4 C9 C8 C7 -0.2(2) . . . . ? 
C3 C9 C8 C7 178.62(12) . . . . ? 
C4 C9 C8 O1 178.36(12) . . . . ? 
C3 C9 C8 O1 -2.9(2) . . . . ? 
C8 O1 C1 C2 2.6(2) . . . . ? 
C8 O1 C1 C10 -176.91(11) . . . . ? 
C12 C11 C10 C15 0.6(2) . . . . ? 
C12 C11 C10 C1 179.19(14) . . . . ? 
C2 C1 C10 C11 171.99(14) . . . . ? 
O1 C1 C10 C11 -8.5(2) . . . . ? 
C2 C1 C10 C15 -9.5(2) . . . . ? 
O1 C1 C10 C15 170.06(12) . . . . ? 
C11 C10 C15 C14 -0.6(2) . . . . ? 
C1 C10 C15 C14 -179.14(14) . . . . ? 
C10 C15 C14 C13 0.4(3) . . . . ? 
C12 C13 C14 C15 -0.3(3) . . . . ? 
O1 C1 C2 C3 -3.6(2) . . . . ? 
C10 C1 C2 C3 175.87(13) . . . . ? 
C1 C2 C3 O2 -178.35(14) . . . . ? 
C1 C2 C3 C9 1.3(2) . . . . ? 
C8 C9 C3 O2 -178.48(13) . . . . ? 
C4 C9 C3 O2 0.3(2) . . . . ? 
C8 C9 C3 C2 1.9(2) . . . . ? 
C4 C9 C3 C2 -179.38(13) . . . . ? 
O1 C8 C7 C6 -178.53(12) . . . . ? 
C9 C8 C7 C6 0.0(2) . . . . ? 
C8 C7 C6 O5 179.50(12) . . . . ? 
C8 C7 C6 C5 -0.3(2) . . . . ? 
O4 C5 C6 O5 1.8(2) . . . . ? 
C4 C5 C6 O5 -179.16(12) . . . . ? 
O4 C5 C6 C7 -178.40(13) . . . . ? 
C4 C5 C6 C7 0.6(2) . . . . ? 

_diffrn_measured_fraction_theta_max    0.992
_diffrn_reflns_theta_full              27.53
_diffrn_measured_fraction_theta_full   0.992
_refine_diff_density_max          0.187
_refine_diff_density_min          -0.236
_refine_diff_density_rms          0.040
